# Supplementary material for: Fc gamma receptors are expressed in the developing rat brain and activate downstream signaling molecules upon cross-linking with immune complex
Source: Springer Nature journal article supplement (doi:10.1186/s12974-017-1050-z), 2018-01-06
Supplement: MOESM6 [file 15347946]

Additional File 6

Hippocampal derived cells DIV7

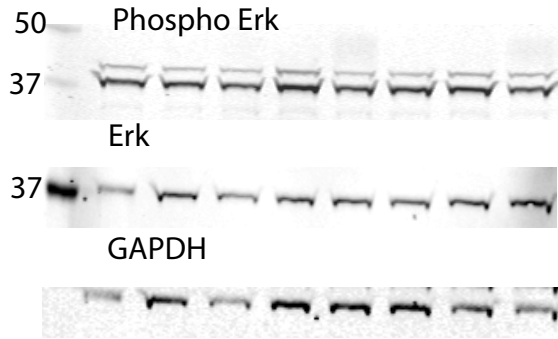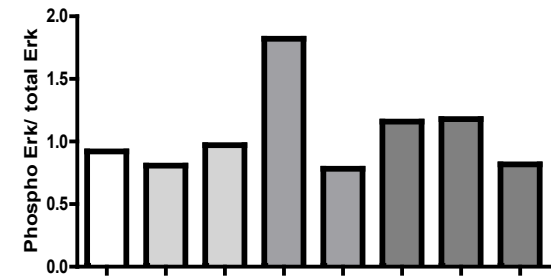

|         |   |   |   |   |   |   |   |   |
|---------|---|---|---|---|---|---|---|---|
| vehicle | + | + | + | + | + | + | + | + |
| r@m 10  | - | + | - | - | - | - | - | - |
| r@m 100 | - | - | + | - | - | - | - | - |
| IC 10   | - | - | - | + | - | - | + | - |
| IC 100  | - | - | - | - | + | - | - | + |
| IFNg    | - | - | - | - | - | + | + | + |

Cortical derived cells DIV7

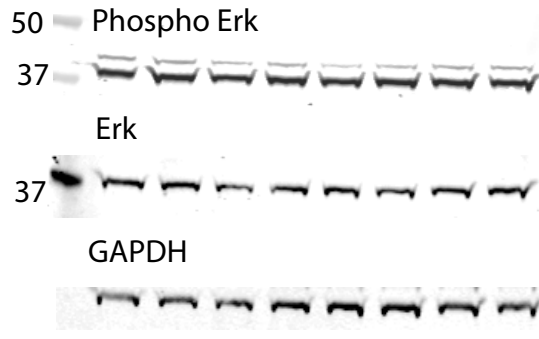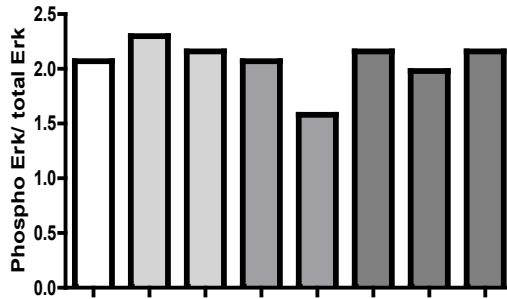

|         |   |   |   |   |   |   |   |   |
|---------|---|---|---|---|---|---|---|---|
|         | + | + | + | + | + | + | + | + |
| r@m 10  | - | + | - | - | - | - | - | - |
| r@m 100 | - | - | + | - | - | - | - | - |
| IC 10   | - | - | - | + | - | - | + | - |
| IC 100  | - | - | - | - | + | - | - | + |
| IFNg    | - | - | - | - | - | + | + | + |

**Erk Phosphorylation after 24h exposure to ImmunoComplexes (IC) and/or IFNg.** DIV7 cortical and hippocampal cells stimulated for 24h with Immuno complexes at 10 and 100ng/m and IFNg 30ng/ml did not increase the MAPKinase Erk phosphorylation.
